# Supplementary material
Source: publisher site journal article supplement (https://www.dovepress.com/article/343598)
Supplement: Supplementary file 1 [file get_supplementary_file.php]

**Supplement table1 Clinical characteristics of patients receiving consolidation treatment.**

| **Characteristics** | **Intermediate/ high-dose cytarabine (n=35)** | **Sequential chemotherapy regimens (n=46)** | ***p*** |
| --- | --- | --- | --- |
| **Age (years), median (range)** | 66(60-76) | 65(60-78) | 0.86 |
| **Sex: M/F, n** | 25/10 | 26/20 | 0.17 |
| **WBC at first diagnosis(×109/L), median (range)** | 26.20(0.78-265.02) | 3.82(0.52-213.90) | 0.23 |
| **PLT at first diagnosis(×109/L), median (range)** | 60(4-268) | 47(9-532) | 0.31 |
| **CD56 positive expression, n (%)** | 7/35(20.0) | 6/46(13.0) | 0.40 |
| **FAB-classification, n (%)** |  |  | 0.73 |
| M6 | 0(0) | 0(0) |  |
| M5 | 15(42.9) | 11(23.9) |  |
| M4 | 4(11.4) | 4(8.7) |  |
| M2 | 6(17.1) | 15(32.6) |  |
| M1 | 3(8.6) | 0(0) |  |
| M0 | 0(0) | 1(2.2) |  |
| Unclassified | 7(20.0) | 15(32.6) |  |
| **Molecular biology, n (%)** |  |  | 0.094 |
| AML1-ETO positive | 2(5.7) | 2(4.3) |  |
| CBFB-MYH11 positive | 2(5.7) | 0(0) |  |
| NPM1 mutation | 10(28.6) | 5(10.9) |  |
| FLT3-ITD mutation | 0(0) | 2(4.3) |  |
| FLT3 mutation MPM1 mutation | 5(14.3) | 2(4.3) |  |
| CEBPA mutation | 3(8.6) | 9(19.6) |  |
| Others | 0(0) | 1(2.2) |  |
| Negative detection | 11(31.4) | 22(47.8) |  |
| No data | 2(5.7) | 3(6.5) |  |
| **ELN risk assessment, n (%)** |  |  | 0.20 |
| Favorable-risk | 14(40.0) | 10(21.7) |  |
| Intermediate-risk | 11(31.4) | 20(43.5) |  |
| High-risk | 10(28.6) | 16(34.8) |  |
| **Pre-induction treatment before confirmed diagnosis, n (%)** |  |  | 0.69 |
| Hydroxyurea | 4(11.4) | 5(10.9) |  |
| Hydroxyurea+ cytarabine+ etoposide | 7(20.0) | 5(10.9) |  |
| Others | 1(2.9) | 1(2.2) |  |
| **Induction chemotherapy** |  |  | 0.030 |
| IDA 8~12mg/m2+ cytarabine 100mg/m2, n (%) | 25(71.4) | 19(41.3) |  |
| CAG or HAG or IAG regimens | 2(5.7) | 10(21.7) |  |
| Hypomethylating agents plus  low dose cytarabine or CAG or HAG or IAG regimens | 4(11.4) | 5(10.9) |  |
| Others | 4(11.4) | 12(26.1) |  |
| **Severe infection during induction, n (%)** | 30(85.7) | 23(50.0) | 0.001 |
| **CNS events (infarction or bleeding) before or during induction, n (%)** | 2(5.7) | 3(6.5) | 0.88 |

**Abbreviations**: WBC, white blood cell; PLT, platelet; FAB, French-American-British; ELN, European LeukemiaNet; IDA, idarubicin; CAG, low-dose cytarabine +aclarubicin +G-CSF; HAG, homoharringtonine+ low-dose cytarabine +G-CSF; IAG, idarubicin +low-dose cytarabine +G-CSF; CNS, central nervous system.

**Supplement figure 1 Survival according to MRD in CR or CRi patients**

For patients who achieved CR/CRi after the first induction treatment, MRD negative group was also associated with higher 2-year OS (71.8% vs 26.5%) (Supplement figure 1A) and 2-year EFS rates (55.9% vs 17.3%) when compared with MRD positive group (p=0.0005, 0.00032) (Supplement figure 1B).

**Abbreviations**: CR, complete remission; CRi, CR with incomplete count recovery; MRD, minimal residual disease; OS, overall survival; EFS, event-free survival.
